# Supplementary material
Source: PubMed Central journal article supplement (PMC10843688)
Supplement: NIHMS1944941-supplement-2.pdf [file NIHMS1944941-supplement-2.pdf]

## Supplementary Figure S2

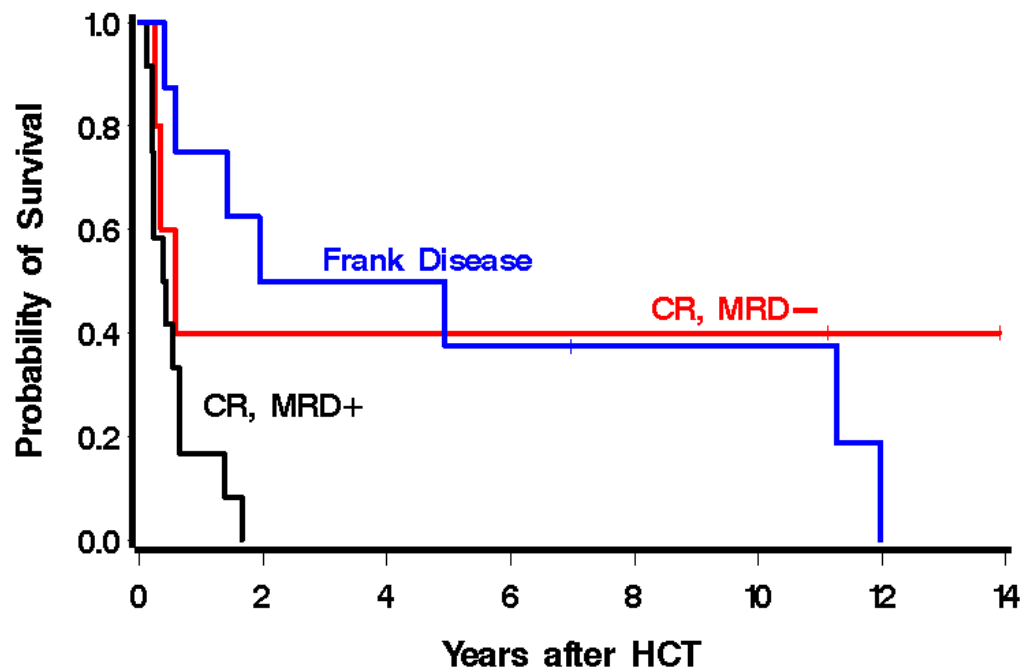

**Supplementary Figure S2: Survival by disease burden at time of HCT.** Estimated probability of survival for patients in a morphologic remission (bone marrow blasts <5% by morphology) with (CR, MRD+) or without measurable residual disease (CR, MRD-), or with frank leukemia (marrow blasts  $\geq$  5% by morphology) before receiving  $^{131}\text{I}$ -anti-CD45 RIT before allogeneic HCT using haploidentical donors.
