# Supplementary material
Source: PubMed Central journal article supplement (PMC10843688)
Supplement: NIHMS1944941-supplement-4.pdf [file NIHMS1944941-supplement-4.pdf]

**Supplementary Table S2: Recipient – Donor Characteristics**

| Patient | Age / Sex | Patient Sex | Disease Status at Treatment                    | Donor Age | Donor Relationship | Donor Sex | Donor CMV status |
|---------|-----------|-------------|------------------------------------------------|-----------|--------------------|-----------|------------------|
| 1       | 30        | M           | AML-refractory relapse                         | 23        | half-sibling       | F         | Neg              |
| 2       | 56        | M           | ALL                                            | 27        | child              | M         |                  |
| 3       | 37        | F           | ALL- in CR2                                    | 39        | sibling            | M         | Neg              |
| 4       | 54        | F           | AML-prior MDS, refractory                      | 31        | child              | M         | Pos              |
| 5       | 35        | M           | AML-primary                                    | 37        | half-sibling       | M         | Pos              |
| 6       | 64        | M           | MDS-RAEB2                                      | 28        | child              | M         | Neg              |
| 7       | 42        | M           | AML- CML blast crisis, 2 <sup>nd</sup> relapse | 62        | father             | M         | Neg              |
| 8       | 52        | F           | AML-primary refractory                         | 29        | child              | M         | Neg              |
| 9       | 56        | F           | *AML in CR2                                    | 24        | child              | M         | Neg              |
| 10      | 37        | M           | *AML-primary                                   | 17        | child              | M         | Pos              |
| 11      | 68        | M           | AML-primary refractory                         | 28        | child              | M         | Pos              |
| 12      | 45        | M           | *T-ALL Primary                                 | 70        | father             | M         | Neg              |
| 13      | 55        | F           | AML-prior CMML                                 | 43        | half-sibling       | M         | Neg              |
| 14      | 25        | F           | *AML Primary                                   | 56        | mother             | F         | Neg              |
| 15      | 53        | F           | *AML- prior MF                                 | 27        | child              | M         | Pos              |
| 16      | 52        | M           | AML - primary                                  | 46        | sibling            | M         | Neg              |
| 17      | 60        | M           | *AML - prior MDS, refractory                   | 19        | child              | M         | Neg              |
| 18      | 69        | M           | AML - primary                                  | 34        | child              | M         | Neg              |
| 19      | 61        | M           | AML - prior PV, refractory                     | 27        | child              | M         | Neg              |
| 20      | 55        | M           | ALL-T cell                                     | 62        | sibling            | F         | Pos              |
| 21      | 68        | F           | AML - prior APL refractory                     | 34        | child              | M         | Pos              |
| 22      | 39        | M           | AML - refractory                               | 32        | sibling            | M         | Pos              |
| 23      | 66        | F           | AML - primary CR2                              | 46        | child              | F         | Pos              |
| 24      | 65        | M           | AML - prior MDS Refractory                     | 34        | child              | F         | Neg              |
| 25      | 53        | M           | *AML - primary                                 | 55        | sibling            | F         | Pos              |
